# Supplementary material for: Diagnosis value of aberrantly expressed microRNA profiles in lung squamous cell carcinoma: a study based on the Cancer Genome Atlas
Source: PeerJ. 2017 Nov 30;5:e4101. doi: 10.7717/peerj.4101 (PMC5712466; doi:10.7717/peerj.4101)
Supplement: Supplemental Information 1 [file peerj-05-4101-s001.xlsx]

## Sheet: Sheet1
bcr_patient_barcode	vital_status	vital_status	days_to_death	days_to_last_followup	age_at_initial_pathologic_diagnosis	pathologic_stage	pathology_T_stage	pathology_N_stage	pathology_M_stage	gender	radiation_therapy	number_pack_years_smoked	race
tcga-18-5592	alive	0	NA	1519	57	stage iib	t3	n0	m0	male	yes	40	NA
tcga-21-5782	dead	1	962	NA	68	stage ib	t2	n0	m0	female	no	48	white
tcga-21-5783	dead	1	2680	NA	76	stage ib	t2	n0	m0	male	no	NA	white
tcga-21-5784	alive	0	NA	1268	80	stage ib	t2	n0	m0	female	no	14	white
tcga-21-5786	alive	0	NA	1032	64	stage ib	t2	n0	m0	male	no	75	white
tcga-21-5787	dead	1	329	NA	65	stage iiia	t2	n2	m0	male	yes	100	black or african american
tcga-22-4593	dead	1	1067	NA	77	stage iia	t2b	n0	m0	male	no	30	white
tcga-22-4605	dead	1	974	NA	78	stage ib	t2	n0	m0	female	yes	75	NA
tcga-22-4609	dead	1	291	NA	81	stage ia	t1	n0	m0	male	no	77	white
tcga-22-5474	dead	1	445	NA	74	stage ib	t2a	n0	m0	male	no	50	white
tcga-22-5477	dead	1	1346	NA	65	stage ia	t1	n0	m0	male	no	100	white
tcga-22-5478	dead	1	24	NA	79	stage ib	t2a	n0	m0	male	no	NA	NA
tcga-22-5479	dead	1	2625	NA	64	stage ib	t2	n0	m0	male	no	35	white
tcga-22-5480	dead	1	2170	NA	66	stage ia	t1b	n0	m0	female	no	50	white
tcga-22-5481	dead	1	2409	NA	72	stage iib	t2	n1	m0	female	no	75	white
tcga-22-5482	dead	1	357	NA	81	stage ib	t2a	n0	m0	male	no	60	white
tcga-22-5483	dead	1	573	NA	74	stage iia	t1a	n1	m0	male	no	50	white
tcga-22-5485	dead	1	916	NA	58	stage ia	t1a	n0	m0	female	no	60	white
tcga-22-5489	dead	1	1912	NA	64	stage ia	t1b	n0	m0	male	no	70	white
tcga-22-5491	dead	1	1713	NA	74	stage ia	t1a	n0	m0	male	NA	57	white
tcga-22-5492	dead	1	506	NA	73	stage iiia	t2a	n2	m0	female	NA	50	NA
tcga-33-4587	dead	1	1656	NA	63	stage ib	t2	n0	mx	female	no	NA	white
tcga-33-6738	alive	0	NA	1927	80	stage iiia	t1	n2	mx	male	no	50	white
tcga-33-a4wn	dead	1	143	NA	60	stage ib	t2a	n0	mx	male	NA	60	white
tcga-33-a5gw	dead	1	9	NA	67	stage iia	t1a	n1	mx	male	no	50	white
tcga-33-aas8	dead	1	1114	NA	59	stage ia	t1	n0	mx	female	no	60	black or african american
tcga-33-aasb	dead	1	211	NA	66	stage ib	t2	n0	mx	male	no	40	black or african american
tcga-33-aasd	dead	1	3376	NA	83	stage ia	t1	n0	mx	male	no	84	black or african american
tcga-33-aasi	dead	1	1344	NA	65	stage iib	t2	n1	mx	female	yes	60	black or african american
tcga-33-aasj	dead	1	3600	NA	60	stage ib	t2	n0	mx	male	no	NA	black or african american
tcga-33-aasl	dead	1	826	NA	57	stage ia	t1	n0	mx	female	no	60	black or african american
tcga-34-5231	dead	1	1984	NA	72	stage ia	t1	n0	m0	male	no	50	white
tcga-34-5232	alive	0	NA	2471	75	stage iia	t1	n1	m0	female	no	NA	black or african american
tcga-34-5234	alive	0	NA	2271	71	stage ia	t1	n0	m0	female	no	40	white
tcga-34-5236	dead	1	276	NA	60	stage iib	t3	n0	m0	male	no	NA	white
tcga-34-5239	alive	0	NA	1834	75	stage iiia	t4	n0	m0	male	no	NA	white
tcga-34-5927	alive	0	NA	1361	70	stage ia	t1	n0	m0	female	no	NA	white
tcga-34-5928	alive	0	NA	1196	83	stage iib	t2	n1	m0	female	no	40	white
tcga-34-5929	dead	1	151	NA	78	stage ib	t2	n0	m0	female	no	40	white
tcga-34-7107	dead	1	34	NA	70	stage ii	t2a	n0	m0	male	NA	NA	white
tcga-34-8454	alive	0	NA	1180	62	stage iiia	t3	n1	m0	female	no	90	white
tcga-34-8455	dead	1	123	NA	67	stage iv	t4	n0	m1a	male	no	50	white
tcga-34-8456	alive	0	NA	804	71	stage iia	t2a	n1	m0	female	no	20	white
tcga-34-a5ix	alive	0	NA	1031	80	stage iib	t3	n0	m0	male	no	NA	white
tcga-37-3783	alive	0	NA	122	51	stage iiia	t3	n2	m0	male	NA	NA	white
tcga-37-3789	alive	0	NA	13	65	stage ib	t2	n0	NA	male	NA	NA	white
tcga-37-a5el	dead	1	1143	NA	53	stage iib	t3	n0	m0	male	yes	NA	white
tcga-37-a5em	alive	0	NA	867	49	stage ii	t2	n0	m0	male	no	NA	white
tcga-37-a5en	alive	0	NA	660	59	stage iiib	t4	n2	m0	male	no	NA	white
tcga-39-5019	alive	0	NA	3387	70	stage ib	t2a	n0	m0	male	no	30	white
tcga-39-5022	dead	1	1679	NA	76	stage ib	t2a	n0	m0	male	no	35	white
tcga-39-5024	alive	0	NA	2510	65	stage iiia	t2a	n2	m0	female	no	40	white
tcga-39-5027	alive	0	NA	3108	73	stage ib	t2a	n0	m0	male	no	40	white
tcga-39-5040	dead	1	519	NA	59	stage iiia	t2a	n2	m0	male	yes	60	white
tcga-43-5670	alive	0	NA	849	70	stage iia	t2b	n0	m0	male	no	30	white
tcga-43-6143	alive	0	NA	699	70	stage ib	t2	n0	m0	male	no	114	white
tcga-43-6647	alive	0	NA	757	69	stage iib	t2b	n1	mx	female	no	36	white
tcga-43-6770	alive	0	NA	653	59	stage ib	t2a	n0	mx	female	no	34	black or african american
tcga-43-6771	dead	1	166	NA	85	stage ib	t2	n0	mx	male	no	40	white
tcga-43-6773	dead	1	116	NA	76	stage iib	t2	n1	mx	male	no	NA	white
tcga-43-7656	alive	0	NA	596	71	stage ia	t1b	n0	mx	male	no	45	white
tcga-43-8115	alive	0	NA	407	72	stage iia	t2a	n1	mx	female	no	55.83	white
tcga-43-8116	alive	0	NA	358	73	stage ia	t1b	n0	m0	male	no	35	white
tcga-43-a474	alive	0	NA	353	66	stage iia	t2b	n0	m0	male	no	47	white
tcga-43-a56u	alive	0	NA	432	76	stage ia	t1b	n0	mx	female	no	20.5	white
tcga-46-6025	alive	0	NA	324	71	stage iib	t2b	n1	m0	male	no	NA	white
tcga-46-6026	alive	0	NA	423	81	stage iib	t2a	n1	m0	male	yes	NA	white
tcga-52-7622	alive	0	NA	862	62	stage ia	t1a	n0	m0	female	no	22	white
tcga-52-7809	dead	1	166	NA	74	stage ib	t2	n0	m0	male	NA	60	white
tcga-52-7810	alive	0	NA	923	60	stage iib	t3	n0	m0	female	yes	20	white
tcga-52-7811	dead	1	266	NA	67	stage ib	t2	n0	m0	male	no	50	white
tcga-56-5897	alive	0	NA	378	74	stage ia	t1b	n0	mx	male	no	NA	white
tcga-56-5898	alive	0	NA	555	69	stage ia	t1b	n0	m0	male	no	NA	white
tcga-56-6545	alive	0	NA	666	77	stage ib	t2a	n0	m0	female	no	NA	white
tcga-56-6546	dead	1	NA	NA	67	stage iia	t2b	n0	mx	male	no	NA	white
tcga-56-7222	dead	1	562	NA	60	stage ib	t2a	n0	m0	male	no	23	white
tcga-56-7223	dead	1	442	NA	66	stage iiia	t3	n1	mx	male	no	NA	white
tcga-56-7579	dead	1	951	NA	61	stage iiia	t3	n1	m0	male	yes	2	white
tcga-56-7580	alive	0	NA	925	84	stage ib	t2a	n0	m0	male	no	NA	white
tcga-56-7582	alive	0	NA	601	83	stage ib	t2a	n0	m0	male	no	NA	white
tcga-56-7730	dead	1	198	NA	73	stage iia	t2b	n0	m0	male	yes	NA	white
tcga-56-7731	dead	1	3	NA	66	stage ib	t2a	n0	mx	female	no	100	white
tcga-56-7822	dead	1	532	NA	75	stage iib	t2b	n1	m0	male	NA	60	black or african american
tcga-56-7823	alive	0	NA	1011	58	stage iia	t1b	n1	m0	female	no	80	white
tcga-56-8082	alive	0	NA	455	80	stage iia	t2b	n0	mx	female	no	NA	white
tcga-56-8083	alive	0	NA	150	56	stage ib	t2a	n0	mx	male	NA	30	white
tcga-56-8304	alive	0	NA	106	73	stage ia	t1b	n0	mx	female	NA	58	white
tcga-56-8307	alive	0	NA	818	55	stage iib	t3	n0	m0	female	no	35	white
tcga-56-8309	alive	0	NA	428	66	stage ia	t1b	n0	mx	male	no	50	white
tcga-56-8503	alive	0	NA	41	76	stage iib	t3	n0	m0	female	NA	91	white
tcga-56-8622	alive	0	NA	55	68	stage ib	t2a	n0	m0	male	NA	40	white
tcga-56-8623	dead	1	692	NA	71	stage ib	t2a	n0	mx	male	no	45	white
tcga-56-8624	alive	0	NA	420	84	stage iib	t3	n0	mx	male	no	20	white
tcga-56-8625	dead	1	315	NA	66	stage iiia	t3	n1	mx	female	no	NA	white
tcga-56-8626	dead	1	302	NA	59	stage ia	t1a	n0	mx	male	no	50	white
tcga-56-8628	alive	0	NA	616	78	stage ia	t1b	n0	mx	male	no	NA	white
tcga-56-8629	alive	0	NA	481	63	stage iia	t2b	n0	mx	male	no	66	white
tcga-56-a49d	alive	0	NA	637	67	stage iiia	t2a	n2	mx	male	no	53	white
tcga-56-a4bw	alive	0	NA	585	55	stage iia	t2a	n1	m0	male	no	120	white
tcga-56-a4bx	alive	0	NA	405	70	stage iia	t2b	n0	mx	male	no	83	white
tcga-56-a4zk	alive	0	NA	570	76	stage ib	t2	n0	m0	female	no	NA	white
tcga-56-a62t	alive	0	NA	440	78	stage iia	t2b	n0	mx	male	yes	102	black or african american
tcga-58-8386	dead	1	1	NA	75	stage iv	t3	nx	m1	male	no	65	NA
tcga-58-8387	dead	1	403	NA	60	stage iia	t2b	n0	m0	male	no	40	white
tcga-58-8388	dead	1	412	NA	60	stage ib	t2a	n0	m0	male	no	80	white
tcga-58-8390	alive	0	NA	911	70	stage iia	t2b	n0	m0	male	no	120	white
tcga-58-8391	alive	0	NA	2167	57	stage iiia	t2	n2	m0	female	yes	30	white
tcga-58-8392	dead	1	501	NA	70	stage ib	t2a	n0	m0	male	no	80	white
tcga-58-8393	alive	0	NA	1058	68	stage ib	t2a	n0	m0	female	no	7	white
tcga-58-a46j	alive	0	NA	2589	64	stage iib	t2	n1	m0	male	no	NA	white
tcga-58-a46k	dead	1	1045	NA	59	stage iiia	t2	n2	m0	male	yes	10	white
tcga-58-a46l	alive	0	NA	1723	73	stage iiia	t2	n2	m0	male	no	NA	white
tcga-58-a46m	alive	0	NA	1072	61	stage iib	t2b	n1	m0	male	no	NA	white
tcga-58-a46n	alive	0	NA	910	52	stage ib	t2a	n0	m0	male	no	50	white
tcga-60-2697	dead	1	372	NA	41	stage iia	t2	n2	m0	male	no	NA	white
tcga-60-2703	dead	1	2945	NA	73	stage iib	t2	n1	m0	male	no	50	white
tcga-60-2704	dead	1	1154	NA	73	stage iib	t2	n1	m0	male	no	60	white
tcga-60-2709	alive	0	NA	1505	69	stage ib	t2	n0	mx	male	no	157.5	black or african american
tcga-63-6202	alive	0	NA	1602	NA	stage iia	t2	n0	m0	male	no	35	NA
tcga-63-7020	alive	0	NA	2133	NA	stage ia	t1	n0	m0	male	no	50	NA
tcga-63-7021	alive	0	NA	2142	NA	stage ia	t1	n0	m0	male	no	21	NA
tcga-63-7022	alive	0	NA	2073	NA	stage ia	t1	n0	m0	female	no	30	NA
tcga-63-a5m9	alive	0	NA	0	NA	stage iib	t2	n1	m0	female	NA	25	NA
tcga-63-a5mb	alive	0	NA	3123	62	stage ib	t2	n0	m0	male	no	25	NA
tcga-63-a5mg	alive	0	NA	2148	68	stage ib	t2	n0	m0	male	no	NA	NA
tcga-63-a5mi	alive	0	NA	1784	65	stage iiia	t2	n2	m0	male	no	50	NA
tcga-63-a5mj	alive	0	NA	1824	54	stage iib	t2	n1	m0	male	no	NA	NA
tcga-63-a5ml	alive	0	NA	1386	68	stage ib	t2	n0	m0	male	no	60	NA
tcga-63-a5mm	dead	1	456	NA	69	stage iib	t2	n1	m0	female	no	30	NA
tcga-63-a5mn	dead	1	345	NA	78	stage iib	t3	n0	m0	female	yes	NA	NA
tcga-63-a5mp	alive	0	NA	769	56	stage iib	t2	n1	m0	male	yes	41	NA
tcga-63-a5mr	alive	0	NA	2716	70	stage ib	t2	n0	m0	female	no	120	NA
tcga-63-a5ms	alive	0	NA	2381	78	stage ib	t2	n0	m0	male	no	6	NA
tcga-63-a5mt	alive	0	NA	498	74	stage iib	t3	n0	m0	male	no	100	NA
tcga-63-a5mu	dead	1	NA	NA	48	stage iib	t2b	n1	m0	male	no	15	NA
tcga-63-a5mv	alive	0	NA	1100	69	stage iia	t2b	n0	m0	male	no	50	NA
tcga-63-a5mw	alive	0	NA	1639	76	stage ib	t2	n0	m0	male	no	60	NA
tcga-63-a5my	alive	0	NA	1052	63	stage ia	t1b	n0	m0	male	no	40	NA
tcga-68-7755	alive	0	NA	83	60	stage iia	t1b	n1	m0	female	no	78	white
tcga-68-7756	alive	0	NA	202	84	stage iiia	t4	n1	mx	male	yes	20	white
tcga-68-7757	alive	0	NA	211	74	stage ia	t1b	n0	mx	male	no	25	white
tcga-68-8251	alive	0	NA	406	78	stage ib	t2a	n0	m0	male	no	52	white
tcga-68-a59i	alive	0	NA	492	73	stage iiia	t3	n1	m0	female	yes	50	black or african american
tcga-68-a59j	alive	0	NA	448	74	stage ib	t2a	n0	mx	female	no	45	white
tcga-6a-ab49	dead	1	NA	NA	73	stage ib	t2	n0	mx	female	no	50	black or african american
tcga-70-6722	alive	0	NA	367	47	stage iiia	t3	n1	m0	male	yes	NA	asian
tcga-70-6723	alive	0	NA	375	65	stage iia	t3	n0	m0	male	yes	NA	asian
tcga-77-6842	dead	1	899	NA	79	stage iib	t2	n1	m0	male	no	22.5	white
tcga-77-6843	dead	1	2224	NA	74	stage iia	t1	n1	m0	male	no	30	white
tcga-77-6844	dead	1	2284	NA	74	stage iiia	t3	n1	m0	male	yes	45	white
tcga-77-6845	dead	1	708	NA	69	stage iib	t3	n0	m0	male	no	51	white
tcga-77-7138	dead	1	340	NA	67	stage ib	t2	n0	m0	male	no	20	NA
tcga-77-7139	alive	0	NA	4261	56	stage iib	t2	n1	m0	male	yes	2	white
tcga-77-7141	alive	0	NA	15	64	stage ib	t2	n0	m0	male	no	70	white
tcga-77-7142	alive	0	NA	2227	59	stage ib	t2	n0	m0	female	no	52.5	white
tcga-77-7335	dead	1	2133	NA	62	stage iiib	t4	n2	m0	female	no	52	white
tcga-77-7337	dead	1	3253	NA	65	stage iib	t2	n1	m0	male	no	79.5	white
tcga-77-7338	dead	1	5	NA	64	stage ib	t2	n0	m0	male	no	41.25	white
tcga-77-7463	dead	1	1423	NA	75	stage ib	t2	n0	m0	male	no	42	white
tcga-77-7465	alive	0	NA	990	58	stage iia	t2a	n1	m0	male	NA	120	white
tcga-77-8007	dead	1	198	NA	68	stage iib	t2	n1	m0	male	NA	100	NA
tcga-77-8008	dead	1	2639	NA	68	stage ib	t2	n0	m0	male	no	61.5	NA
tcga-77-8009	dead	1	1695	NA	68	stage iib	t2	n1	m0	male	no	97.5	NA
tcga-77-8128	dead	1	1150	NA	60	stage iiia	t2	n2	m0	male	no	113	NA
tcga-77-8130	alive	0	NA	4765	69	stage iib	t2	n1	m0	male	no	32.25	NA
tcga-77-8131	dead	1	383	NA	72	stage ib	t2	nx	m0	male	NA	69	NA
tcga-77-8133	dead	1	1640	NA	74	stage iia	t1	n1	m0	male	no	22	NA
tcga-77-8136	dead	1	1189	NA	74	stage iib	t2	n1	m0	female	no	135	NA
tcga-77-8138	dead	1	539	NA	74	stage ib	t2	n0	m0	male	no	54	NA
tcga-77-8139	alive	0	NA	3166	72	stage iib	t3	n0	m0	male	no	52	NA
tcga-77-8140	dead	1	351	NA	66	stage iib	t2	n1	m0	female	no	78	NA
tcga-77-8143	dead	1	803	NA	76	stage iiia	t2	n2	m0	male	yes	30	NA
tcga-77-8144	alive	0	NA	833	70	stage ib	t2	n0	m0	male	no	59	NA
tcga-77-8145	dead	1	212	NA	73	stage iiib	t4	n1	m0	male	yes	57	NA
tcga-77-8146	alive	0	NA	3189	72	stage ia	t1	n0	m0	male	no	75	NA
tcga-77-8148	alive	0	NA	2023	68	stage iiia	t3	n1	m0	male	no	60	NA
tcga-77-8150	dead	1	1655	NA	64	stage iiia	t3	n1	m0	male	no	46	NA
tcga-77-8153	alive	0	NA	1992	77	stage ib	t2	n0	m0	female	no	25	NA
tcga-77-8154	alive	0	NA	1841	67	stage ia	t1	n0	m0	male	no	40	NA
tcga-77-8156	alive	0	NA	1106	60	stage ib	t2a	n0	m0	male	no	57.5	NA
tcga-77-a5fz	dead	1	3838	NA	64	stage iiib	t4	n0	m0	male	no	141	NA
tcga-77-a5g1	alive	0	NA	4026	75	stage iiia	t3	n1	m0	male	no	53	NA
tcga-77-a5g3	alive	0	NA	4570	63	stage iib	t2	n1	m0	male	no	40	NA
tcga-77-a5g6	dead	1	678	NA	66	stage iiia	t2	n2	m0	male	no	74	NA
tcga-77-a5g7	dead	1	180	NA	63	stage ia	t1	n0	m0	male	no	69	NA
tcga-77-a5g8	alive	0	NA	1884	70	stage iib	t3	n0	m0	male	NA	90	NA
tcga-77-a5gf	dead	1	840	NA	70	stage iia	t2a	n1	m0	male	no	60	NA
tcga-77-a5gh	alive	0	NA	1182	81	stage ib	t2a	n0	m0	male	no	11	NA
tcga-79-5596	alive	0	NA	NA	NA	stage iiia	t3	n1	m0	male	no	40	NA
tcga-85-6175	dead	1	294	NA	63	stage iib	t3	n0	m0	female	no	NA	white
tcga-85-6560	alive	0	NA	1259	59	stage iia	t1b	n1	m0	male	no	40	white
tcga-85-6561	alive	0	NA	1224	66	stage ib	t2a	nx	m0	male	yes	35	white
tcga-85-6798	dead	1	195	NA	57	stage iiia	t3	n1	m0	male	no	35	white
tcga-85-7696	alive	0	NA	1111	64	stage ia	t1	n0	m0	male	no	30	white
tcga-85-7697	alive	0	NA	1063	49	stage iib	t3	n0	m0	male	no	30	white
tcga-85-7698	alive	0	NA	952	48	stage ia	t1b	n0	m0	male	no	44	white
tcga-85-7699	dead	1	1001	NA	73	stage iiia	t4	n0	m0	male	no	74	white
tcga-85-7710	alive	0	NA	42	59	stage ia	t1b	n0	m0	female	no	45	white
tcga-85-7843	alive	0	NA	35	50	stage iia	t2a	n1	m0	male	NA	35	white
tcga-85-7844	alive	0	NA	911	71	stage ib	t2a	n0	m0	male	no	40	white
tcga-85-7950	alive	0	NA	576	46	stage ib	t2a	n0	m0	male	no	27	white
tcga-85-8048	alive	0	NA	765	62	stage ia	t1	n0	m0	male	no	50	white
tcga-85-8049	alive	0	NA	579	57	stage ib	t2a	n0	m0	male	no	NA	white
tcga-85-8052	alive	0	NA	734	53	stage iib	t3	n0	m0	male	no	40	white
tcga-85-8070	alive	0	NA	960	71	stage ib	t2	n0	m0	male	no	50	white
tcga-85-8071	alive	0	NA	815	52	stage iia	t1a	n1	m0	male	no	30	white
tcga-85-8072	alive	0	NA	932	60	stage ia	t1a	n0	m0	male	no	15	white
tcga-85-8276	alive	0	NA	1050	62	stage iia	t1b	n1	m0	male	no	20	white
tcga-85-8277	dead	1	307	NA	70	stage iiia	t3	n1	m0	male	no	NA	white
tcga-85-8288	dead	1	402	NA	70	stage iia	t1b	n1	m0	male	no	50	white
tcga-85-8350	alive	0	NA	683	61	stage ia	t1b	n0	m0	male	no	40	white
tcga-85-8351	alive	0	NA	510	72	stage iia	t2a	n1	m0	male	no	60	white
tcga-85-8352	dead	1	161	NA	67	stage iiia	t3	n1	m0	male	no	50	white
tcga-85-8353	dead	1	94	NA	72	stage iiia	t3	n1	m0	male	no	50	white
tcga-85-8354	alive	0	NA	995	53	stage ib	t2a	n0	m0	male	no	30	white
tcga-85-8355	alive	0	NA	61	63	stage ia	t1a	n0	m0	male	no	NA	white
tcga-85-8479	alive	0	NA	468	66	stage ia	t1a	n0	m0	male	NA	90	white
tcga-85-8481	dead	1	236	NA	70	stage iib	t3	n0	m0	male	no	80	white
tcga-85-8580	alive	0	NA	1113	52	stage ib	t2a	n0	m0	female	no	38	white
tcga-85-8582	alive	0	NA	1160	49	stage ia	t1a	n0	m0	male	no	40	white
tcga-85-8584	dead	1	383	NA	71	stage iia	t2a	n1	m0	male	NA	50	white
tcga-85-8664	dead	1	550	NA	73	stage iib	t2b	n1	m0	male	no	60	white
tcga-85-8666	dead	1	687	NA	65	stage ib	t2a	n0	m0	male	no	55	white
tcga-85-a4cl	dead	1	921	NA	65	stage ia	t1b	n0	m0	male	no	40	white
tcga-85-a4cn	alive	0	NA	1038	56	stage iib	t2b	n1	m0	female	yes	NA	white
tcga-85-a4jb	alive	0	NA	942	74	stage iib	t3	n0	m0	male	no	25	white
tcga-85-a4jc	dead	1	604	NA	84	stage iia	t2b	n0	m0	male	no	25	white
tcga-85-a4pa	alive	0	NA	741	61	stage ib	t2a	n0	m0	male	no	40	white
tcga-85-a4qq	dead	1	927	NA	68	stage ib	t2a	n0	m0	male	no	50	white
tcga-85-a4qr	alive	0	NA	600	67	stage ib	t2a	n0	m0	male	no	50	white
tcga-85-a50m	dead	1	826	NA	47	stage iia	t2b	n0	m0	male	no	15	asian
tcga-85-a50z	alive	0	NA	493	57	stage iia	t2b	n0	m0	male	no	45	white
tcga-85-a510	alive	0	NA	482	74	stage iib	t2b	n1	m0	female	no	45	white
tcga-85-a511	dead	1	455	NA	62	stage iib	t2b	n1	m0	male	no	40	white
tcga-85-a512	alive	0	NA	465	46	stage iia	t1b	n1	m0	male	no	25	white
tcga-85-a513	alive	0	NA	910	60	stage ia	t1a	nx	m0	female	no	NA	asian
tcga-85-a53l	alive	0	NA	377	63	stage iia	t2b	n0	m0	male	no	30	asian
tcga-85-a5b5	alive	0	NA	111	58	stage ia	t1b	n0	m0	male	no	15	white
tcga-90-6837	alive	0	NA	758	64	stage iib	t3	n0	mx	male	no	40	white
tcga-90-7767	alive	0	NA	89	56	stage iib	t2b	n1	mx	male	NA	25	white
tcga-90-7769	alive	0	NA	358	55	stage iib	t2b	n1	mx	male	no	36	white
tcga-90-a4ed	alive	0	NA	615	69	stage ib	t2a	n0	mx	male	no	30	white
tcga-90-a4ee	alive	0	NA	688	53	stage iia	t2a	n1	mx	male	no	68	white
tcga-90-a59q	dead	1	322	NA	61	stage iia	t2a	n1	mx	female	yes	80	white
tcga-92-7340	alive	0	NA	82	45	stage iia	t2a	n1	mx	female	no	15	white
tcga-92-7341	alive	0	NA	106	71	stage ib	t2a	n0	mx	male	no	50	white
tcga-92-8063	alive	0	NA	122	52	stage iiia	t2b	n2	mx	male	yes	74	white
tcga-92-8065	alive	0	NA	70	74	stage iib	t3	n0	mx	female	no	14	white
tcga-94-8035	alive	0	NA	122	64	stage iib	t3	n0	mx	male	no	50	white
tcga-94-8490	alive	0	NA	153	70	stage iib	t3	n0	m0	male	no	NA	white
tcga-94-8491	alive	0	NA	810	73	stage iia	t2a	n1	m0	male	no	56	white
tcga-94-a4vj	alive	0	NA	430	71	stage ia	t1b	n0	m0	female	no	37.5	white
tcga-94-a5i6	alive	0	NA	538	62	stage iib	t3	n0	m0	male	no	80	white
tcga-96-7544	dead	1	2160	NA	83	stage iib	t2	n1	mx	male	no	65	white
tcga-96-8169	alive	0	NA	557	67	stage ia	t1a	n0	m0	female	no	35	white
tcga-96-8170	alive	0	NA	531	75	stage iia	t1a	n1	m0	female	no	50	white
tcga-96-a4jk	alive	0	NA	589	65	stage iia	t2a	n1	m0	male	no	110	white
tcga-96-a4jl	alive	0	NA	842	78	stage iia	t2a	n1	m0	female	no	NA	asian
tcga-98-7454	alive	0	NA	652	73	stage ib	t2a	n0	m0	male	no	60	white
tcga-98-8020	dead	1	84	NA	56	stage iiia	t2	n2	m0	female	no	NA	black or african american
tcga-98-8023	alive	0	NA	649	70	stage iiia	t3	n1	m0	male	no	75	white
tcga-98-a538	alive	0	NA	826	67	stage iib	t3	n0	m0	male	no	35	white
tcga-98-a53a	dead	1	552	NA	70	stage ib	t2a	n0	m0	male	no	80	black or african american
tcga-98-a53b	dead	1	61	NA	69	stage ib	t2a	n0	m0	male	no	40	white
tcga-98-a53c	alive	0	NA	822	77	stage ia	t1a	n0	m0	female	no	112.5	white
tcga-98-a53h	alive	0	NA	618	76	stage ia	t1a	n0	m0	female	no	40	white
tcga-98-a53i	alive	0	NA	565	64	stage iia	t2a	n1	m0	male	no	70	white
tcga-98-a53j	alive	0	NA	630	77	stage ib	t2a	n0	m0	male	no	100	white
tcga-l3-a4e7	alive	0	NA	392	71	stage ib	t2a	n0	m0	male	no	25	white
tcga-l3-a524	dead	1	490	NA	45	stage iib	t3	n0	m0	female	no	25.6	white
tcga-la-a446	alive	0	NA	401	68	stage ia	t1b	n0	mx	male	no	26	white
tcga-la-a7sw	dead	1	408	NA	71	stage iiia	t3	n1	mx	male	yes	37	black or african american
tcga-mf-a522	dead	1	360	NA	54	stage ib	t2a	n0	mx	male	no	45	white
tcga-nc-a5hd	dead	1	2	NA	79	stage iib	t3	n0	m0	male	no	50	white
tcga-nc-a5hg	alive	0	NA	1963	59	stage iiia	t2	n2	m0	male	yes	80	white
tcga-nc-a5hh	alive	0	NA	37	53	stage ia	t1	n0	m0	male	no	60	white
tcga-nc-a5hi	alive	0	NA	1743	68	stage ib	t2	n0	m0	female	no	60	white
tcga-nc-a5hj	dead	1	418	NA	59	stage iib	t3	n0	m0	male	no	78	white
tcga-nc-a5hk	alive	0	NA	128	58	stage iib	t3	n0	m0	female	no	40	white
tcga-nc-a5hl	dead	1	88	NA	73	stage iia	t2b	n0	m0	male	no	40	white
tcga-nc-a5hn	alive	0	NA	1499	77	stage iia	t2a	n1	m0	male	no	100	white
tcga-nc-a5ho	alive	0	NA	1336	70	stage iiia	t3	n1	m0	female	no	30	white
tcga-nc-a5hp	dead	1	770	NA	69	stage iv	t2a	n0	m1b	male	no	50	white
tcga-nc-a5hq	dead	1	448	NA	70	stage iiia	t3	n2	m0	male	yes	NA	white
tcga-nc-a5ht	alive	0	NA	804	69	stage iiia	t3	n1	m0	male	no	50	white
tcga-nk-a5cr	alive	0	NA	2542	77	stage ib	t2	n0	mx	male	no	40	NA
tcga-nk-a5cx	alive	0	NA	111	73	stage iia	t2b	n0	mx	male	no	40	white
tcga-o2-a52n	dead	1	1006	NA	78	stage i	t2	n0	mx	male	no	4.125	white
tcga-o2-a52q	dead	1	113	NA	44	stage iii	t3	n1	mx	female	no	1	white
tcga-o2-a52s	dead	1	387	NA	57	stage iii	t4	n2	mx	female	yes	3	white
tcga-o2-a52v	dead	1	1335	NA	75	stage ii	t3	n0	mx	female	yes	1	black or african american
tcga-o2-a5ib	dead	1	340	NA	71	stage iii	t3	n1	mx	female	no	2.5	white
tcga-xc-aa0x	dead	1	6	NA	77	stage ia	t1a	n0	m0	female	no	30	black or african american
